# Supplementary material for: Fe3O4/Co3O4 binary oxides as bifunctional electrocatalysts for rechargeable Zn–air batteries by one-pot pyrolysis of zeolitic imidazolate frameworks
Source: Royal Society of Chemistry journal article supplement (doi:10.1039/d1se00459j), 2021-01-01
Supplement: d1se00459j1.pdf [file d1se00459j1.pdf]

## Supporting information

### **Fe<sub>3</sub>O<sub>4</sub>/Co<sub>3</sub>O<sub>4</sub> binary oxides as bifunctional electrocatalyst for rechargeable Zn-air battery by one-pot pyrolysis of zeolitic imidazolate frameworks**

Zhili Wang,<sup>a,#</sup> Jinhui Yang,<sup>a,b,#</sup> Yuanting Tang,<sup>a</sup> Zhiping Chen,<sup>c</sup> Qizi Lu,<sup>b,c</sup> Gurong Shen,<sup>d</sup> Yanwei Wen,<sup>a</sup> Xiao Liu,<sup>\*,c</sup> Feng Liu,<sup>e</sup> Rong Chen,<sup>b,c</sup> Bin Shan,<sup>\*,a,b</sup>

<sup>a</sup> State Key Laboratory of Materials Processing and Die & Mould Technology, School of Materials Science and Engineering, Huazhong University of Science and Technology, Wuhan 430074, Hubei, People's Republic of China

<sup>b</sup> China-EU Institute for Clean and Renewable Energy, Huazhong University of Science and Technology, Wuhan 430074, Hubei, People's Republic of China

<sup>c</sup> State Key Laboratory of Digital Manufacturing Equipment and Technology, School of Mechanical Science and Engineering, Huazhong University of Science and Technology, Wuhan 430074, Hubei, People's Republic of China

<sup>d</sup> School of Materials Science and Engineering, Tianjin University, Tianjin 300072, People's Republic of China

<sup>e</sup> State Key Laboratory of Advanced Technologies for Comprehensive Utilization of Platinum Metal, Kunming Institute of Precious Metals, Kunming 650106, Yunnan, People's Republic of China

# Zhili Wang and Jinhui Yang contributed equally to this work.

\* Corresponding authors: [xiaoliu@hust.edu.cn](mailto:xiaoliu@hust.edu.cn) (Xiao Liu), [bshan@mail.hust.edu.cn](mailto:bshan@mail.hust.edu.cn) (Bin Shan)

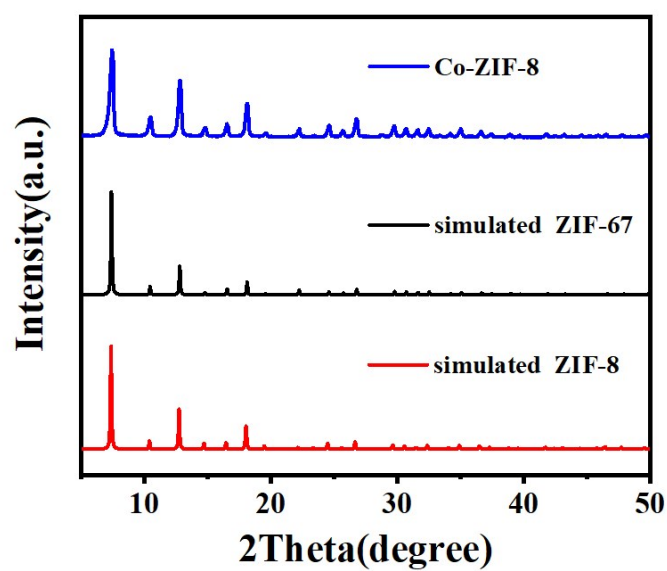

**Fig. S1.** XRD patterns of Co-ZIF-8, simulated ZIF-67 and simulated ZIF-8. All characteristic peaks of simulated ZIF-8 and ZIF-67 are presented in Co-ZIF-8.

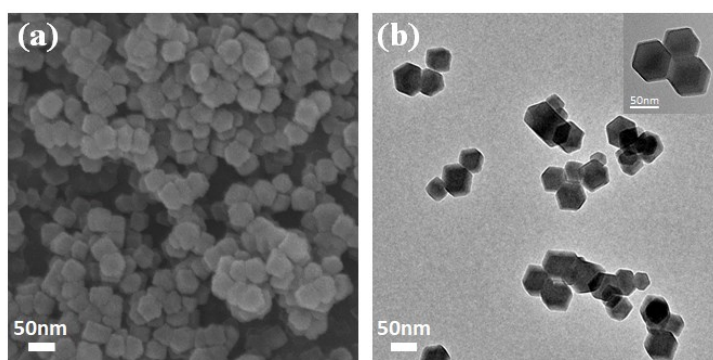

**Fig. S2.** (a) SEM and (b) TEM images of Co-ZIF-8. The as-prepared crystal shows the rhombododecahedral morphology.

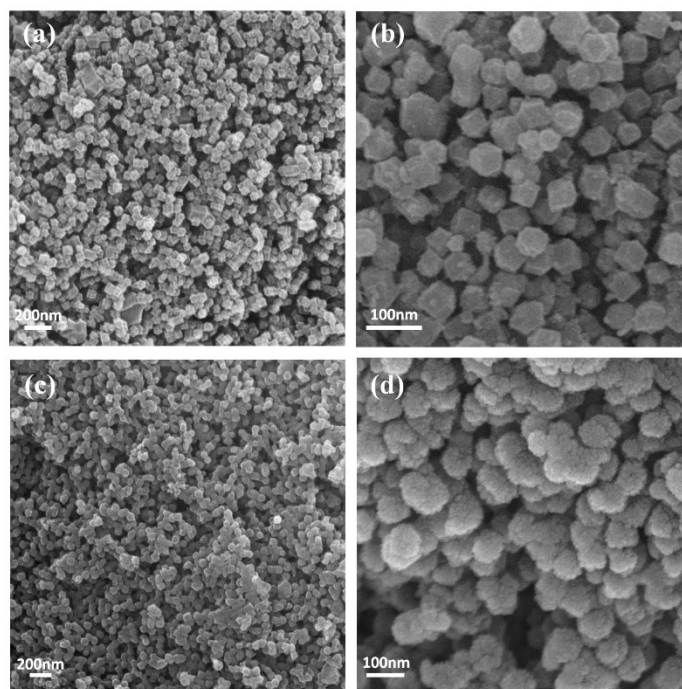

**Fig. S3.** SEM images of (a-b) Co<sub>3</sub>O<sub>4</sub>-CN and (c-d) Fe<sub>2</sub>O<sub>3</sub>-CN.

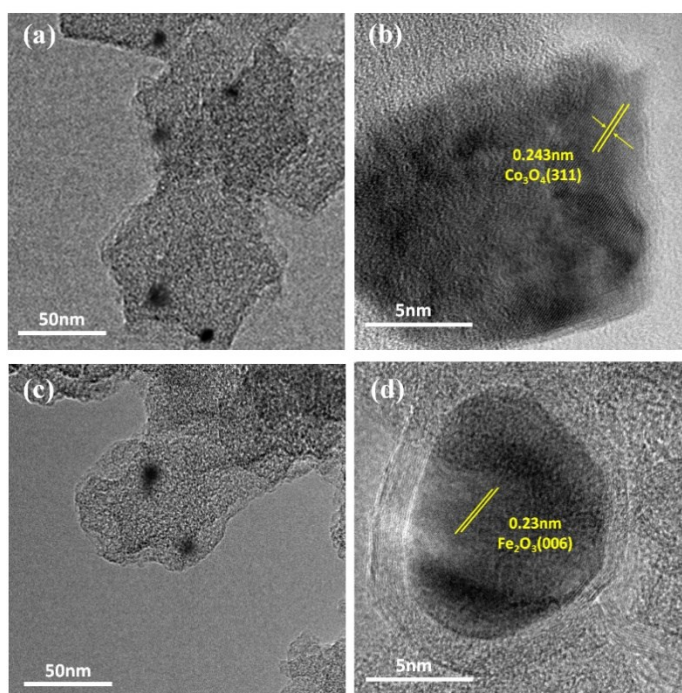

**Fig. S4.** TEM images of (a-b) Co<sub>3</sub>O<sub>4</sub>-CN and (c-d) Fe<sub>2</sub>O<sub>3</sub>-CN, which exhibit the domains of Co<sub>3</sub>O<sub>4</sub> and Fe<sub>2</sub>O<sub>3</sub> in Co<sub>3</sub>O<sub>4</sub>-CN and Fe<sub>2</sub>O<sub>3</sub>-CN catalysts, respectively.

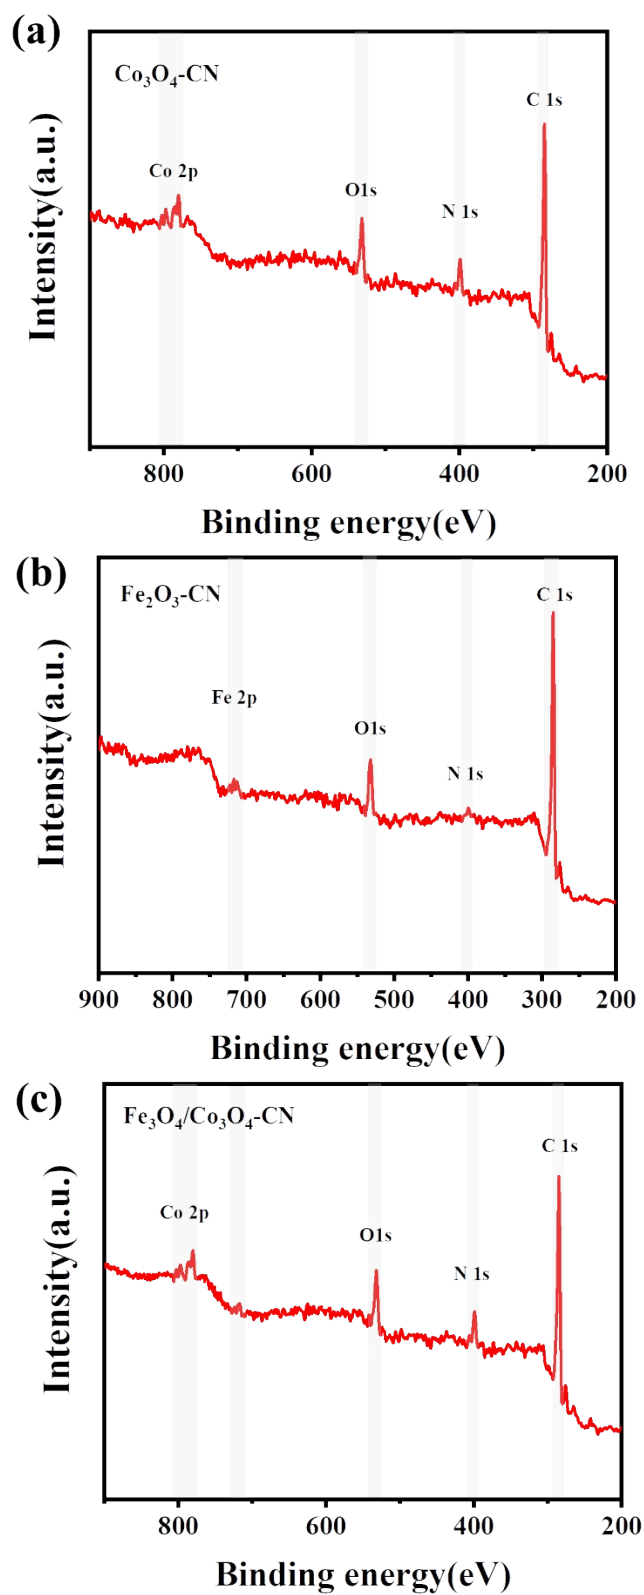

**Fig. S5.** XPS spectra of (a)  $\text{Co}_3\text{O}_4\text{-CN}$ , (b)  $\text{Fe}_2\text{O}_3\text{-CN}$  and (c)  $\text{Fe}_3\text{O}_4/\text{Co}_3\text{O}_4\text{-CN}$ .

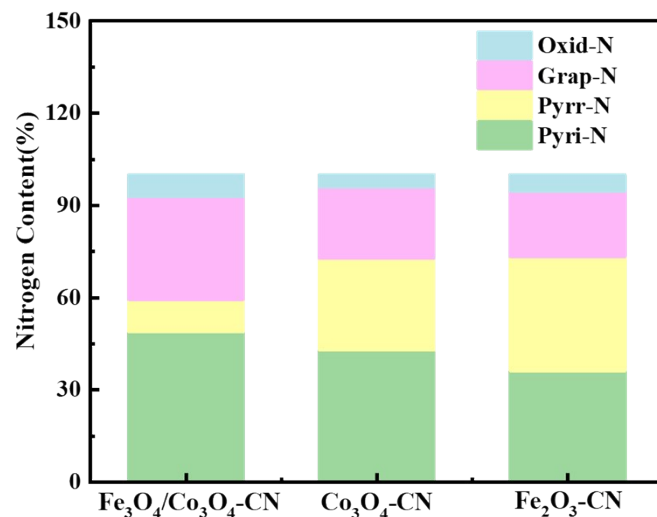

**Fig. S6** The relative contents of different N types (Pyri-N, Pyrr-N, Grap-N, Oxid-N) in the prepared catalysts of Fe<sub>3</sub>O<sub>4</sub>/Co<sub>3</sub>O<sub>4</sub>-CN, Co<sub>3</sub>O<sub>4</sub>-CN and Fe<sub>2</sub>O<sub>3</sub>-CN

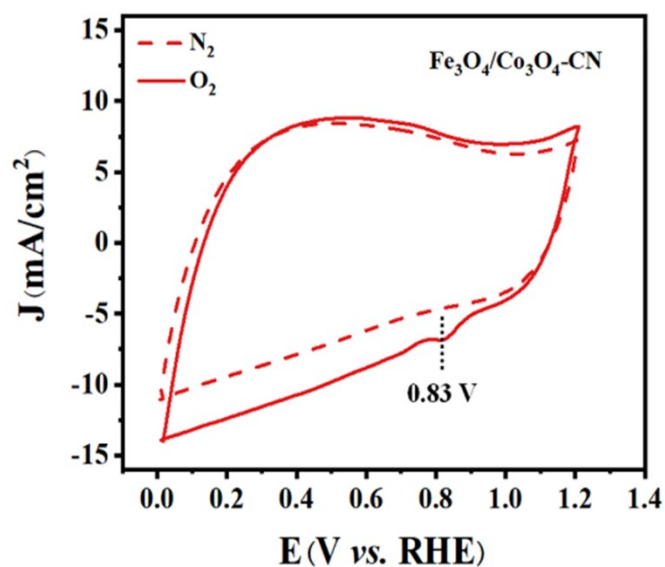

**Fig. S7.** CV curves for Fe<sub>3</sub>O<sub>4</sub>/Co<sub>3</sub>O<sub>4</sub>-CN in N<sub>2</sub> and O<sub>2</sub>-saturated 0.1M KOH solution.

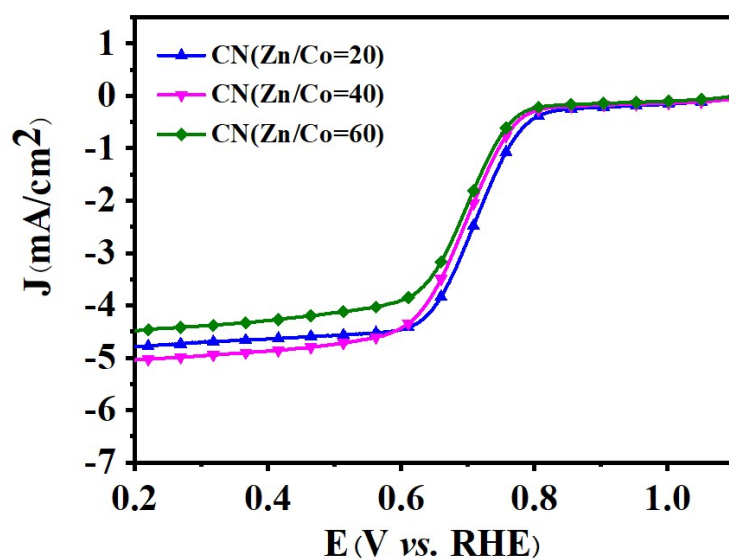

**Fig. S8.** LSV curves of CN obtained with different molar ratio of Zn/Co in Co-ZIF-8 at a rotating rate of 1600 rpm in O<sub>2</sub>-saturated 0.1 M KOH solution. The molar ratio of Zn<sup>2+</sup> and Co<sup>2+</sup> in the solution for Co-ZIF-8 preparation has been optimized to 20:1.

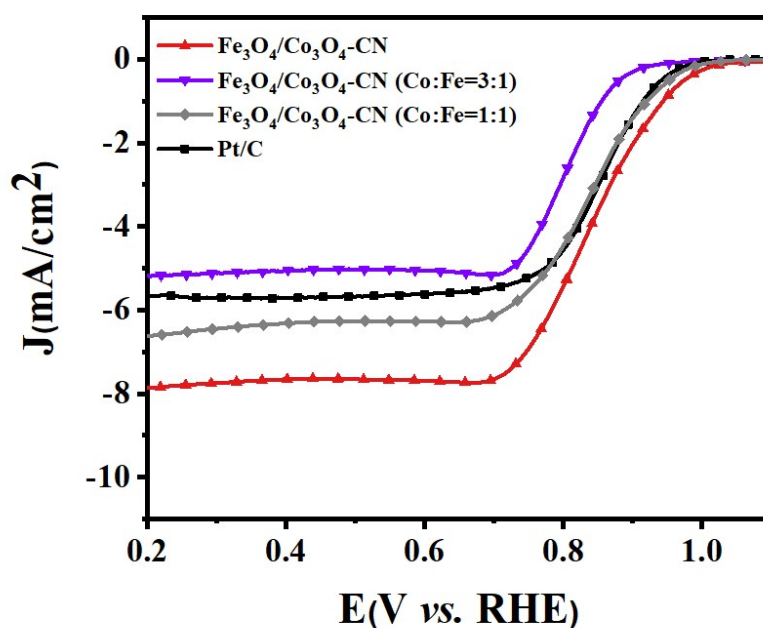

**Fig. S9.** LSV curves of different molar ratio of Co/Fe in Fe<sub>3</sub>O<sub>4</sub>/Co<sub>3</sub>O<sub>4</sub>-CN and Pt/C obtained at a rotating rate of 1600 rpm in O<sub>2</sub>-saturated 0.1 M KOH solution. Co/Fe ratio of 2:1 is the optimized molar ratio in sample preparation.

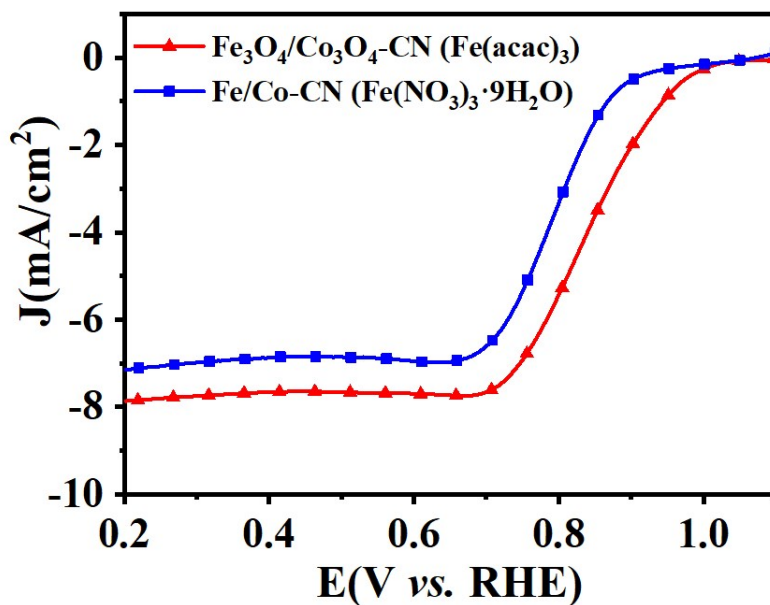

**Fig. S10.** LSV curves of different kind of Fe sources in  $\text{Fe}_3\text{O}_4/\text{Co}_3\text{O}_4\text{-CN}$  at a rotating rate of 1600 rpm in  $\text{O}_2$ -saturated 0.1 M KOH solution. The  $\text{Fe}(\text{acac})_3$  is better than  $\text{Fe}(\text{NO}_3)_3$ .

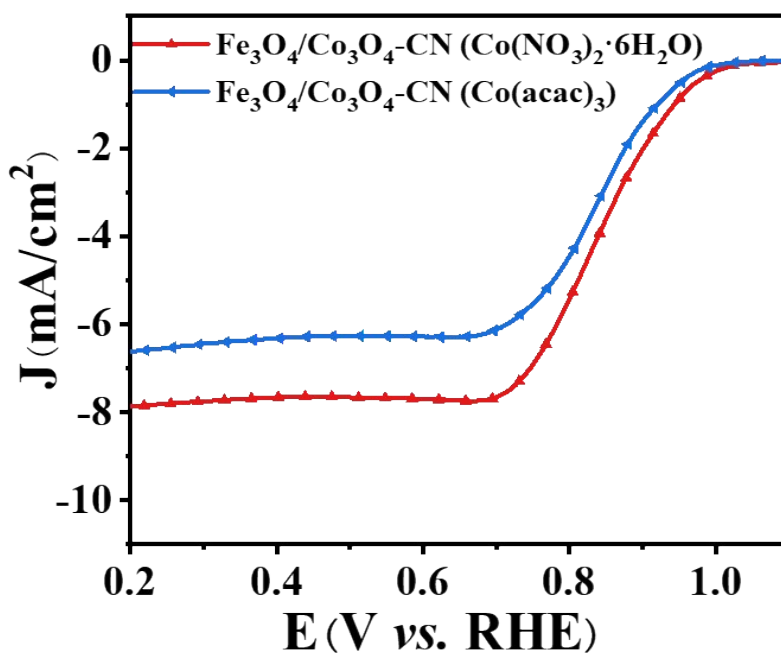

**Fig. S11.** LSV curves of different kind of Co sources in  $\text{Fe}_3\text{O}_4/\text{Co}_3\text{O}_4\text{-CN}$  at a rotating rate of 1600 rpm in  $\text{O}_2$ -saturated 0.1 M KOH solution. The  $\text{Co}(\text{NO}_3)_2$  is better than  $\text{Co}(\text{acac})_3$ .



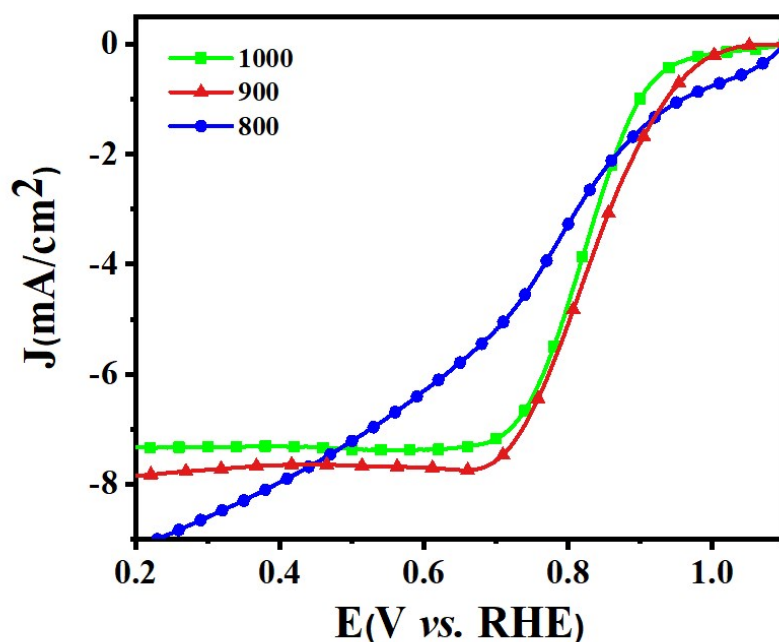

**Fig. S12.** LSV curves of  $\text{Fe}_3\text{O}_4/\text{Co}_3\text{O}_4\text{-CN}$  at different pyrolysis temperature of 800, 900 and 1000 °C. The 900 °C is the optimization temperature for pyrolysis.

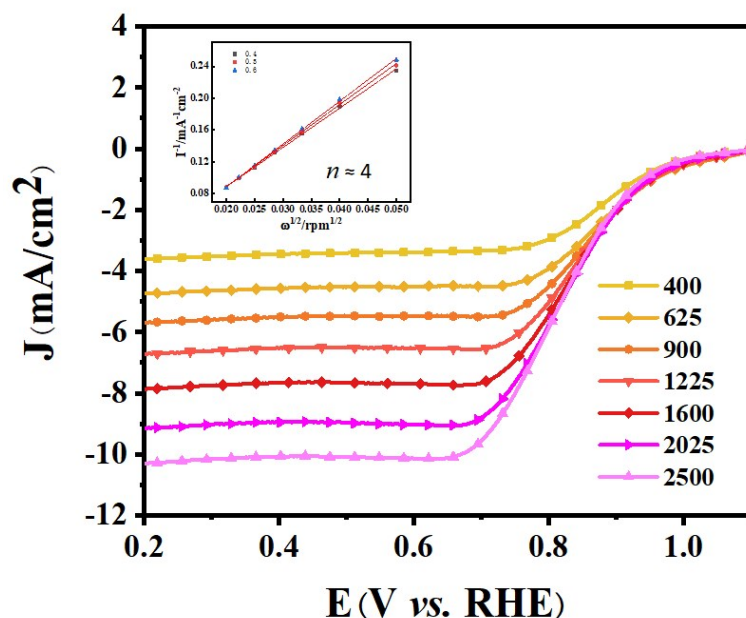

**Fig. S13.** LSV curves for  $\text{Fe}_3\text{O}_4/\text{Co}_3\text{O}_4\text{-CN}$  at a rotation rate from 400 to 2500 rpm. The corresponding Koutecky–Levich plots at various disk potentials are inserted. The electron transfer number calculated by K-L equation is consistent with the result of  $\text{H}_2\text{O}_2$  yields test.



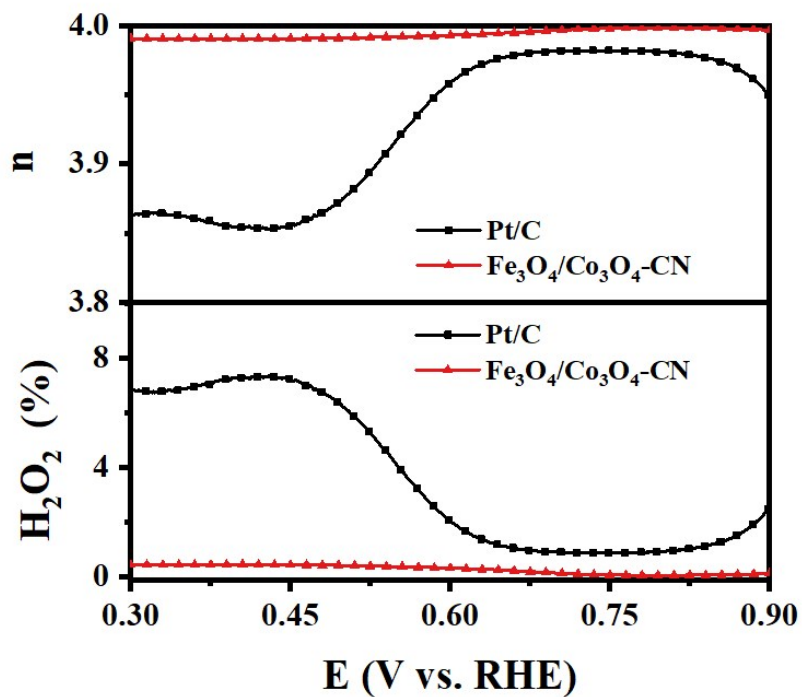

**Fig. S14.** The numbers of electron transfer and  $\text{H}_2\text{O}_2$  yields of  $\text{Fe}_3\text{O}_4/\text{Co}_3\text{O}_4\text{-CN}$  catalyst and commercial Pt/C.

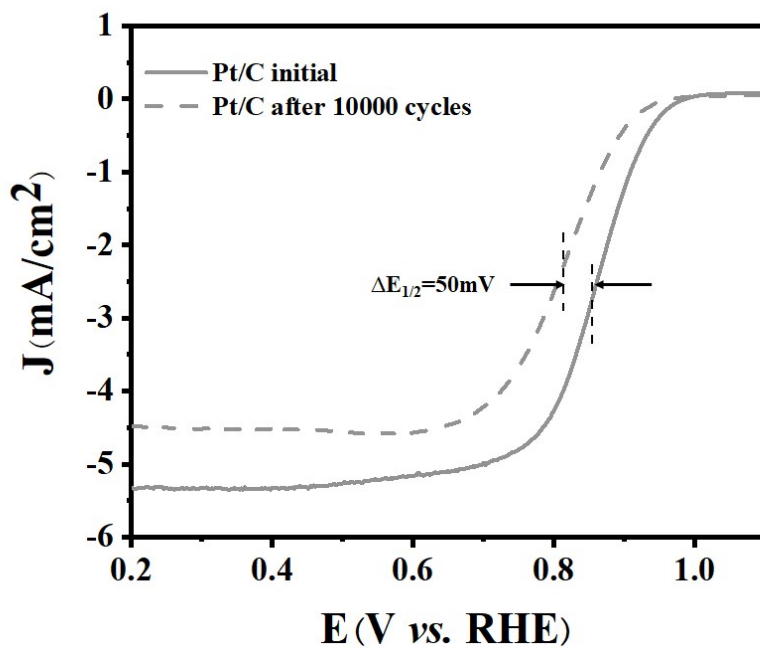

**Fig. S15.** ORR polarization curves of the Pt/C before and after 10000 potential cycles between 0.6 and 1.0 V versus RHE with a scan rate of  $50 \text{ mV s}^{-1}$  in  $\text{O}_2$ -saturated 0.1 M KOH solution.

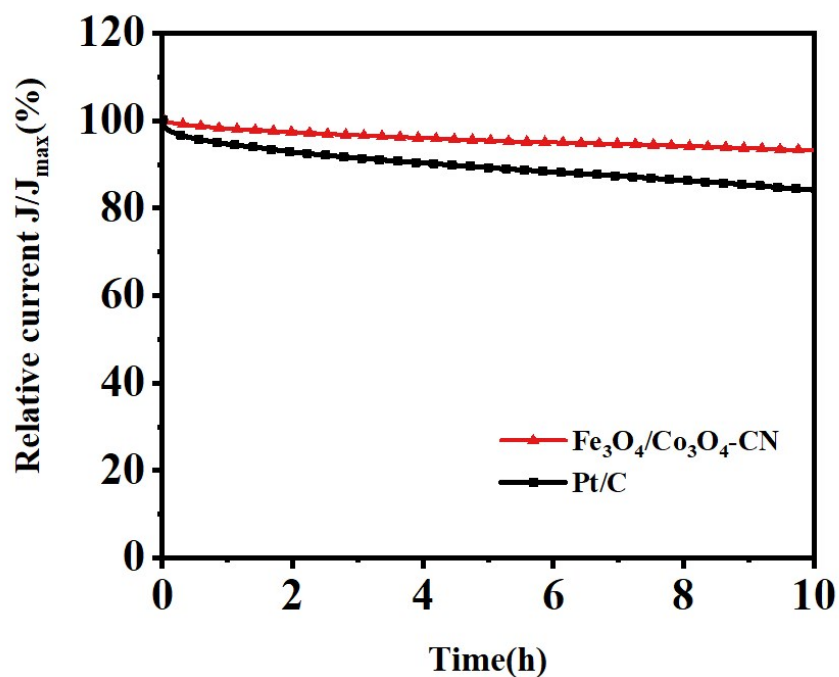

**Fig. S16.** Chronoamperometric response of  $\text{Fe}_3\text{O}_4/\text{Co}_3\text{O}_4\text{-CN}$  and Pt/C at 0.6 V for 10 h.

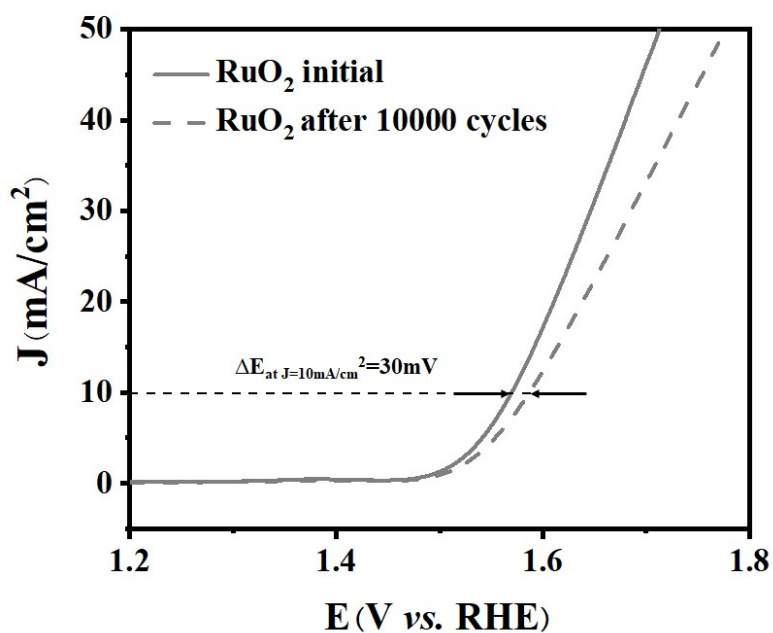

**Fig. S17.** OER polarization curves of the  $\text{RuO}_2$  before and after 10000 potential cycles between 1.4 and 1.8 V versus RHE with a scan rate of  $50 \text{ mV s}^{-1}$  in  $\text{O}_2$ -saturated 0.1 M KOH solution.

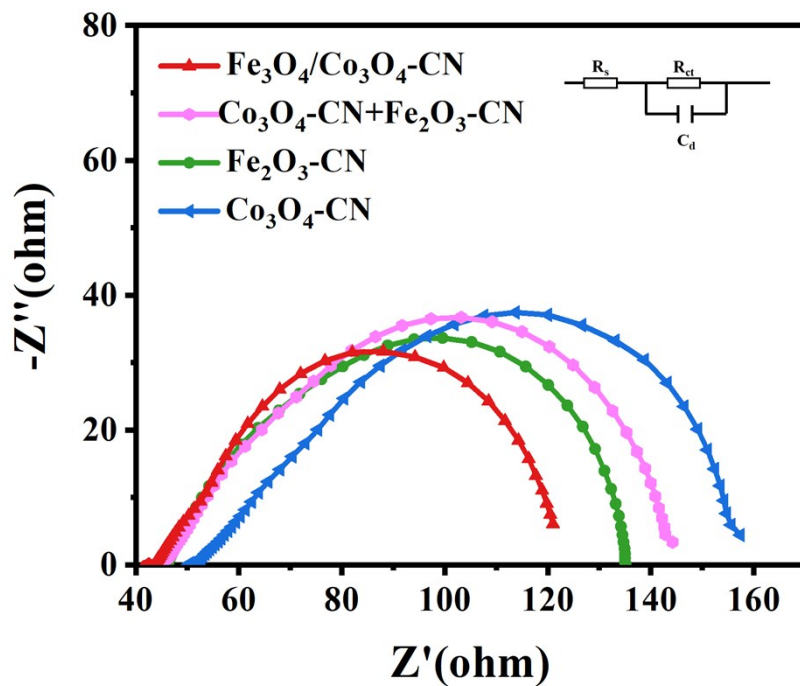

**Fig. S18.** Nyquist plots for Fe<sub>3</sub>O<sub>4</sub>/Co<sub>3</sub>O<sub>4</sub>-CN, Fe<sub>2</sub>O<sub>3</sub>-CN+Co<sub>3</sub>O<sub>4</sub>-CN, Co<sub>3</sub>O<sub>4</sub>-CN and Fe<sub>2</sub>O<sub>3</sub>-CN.

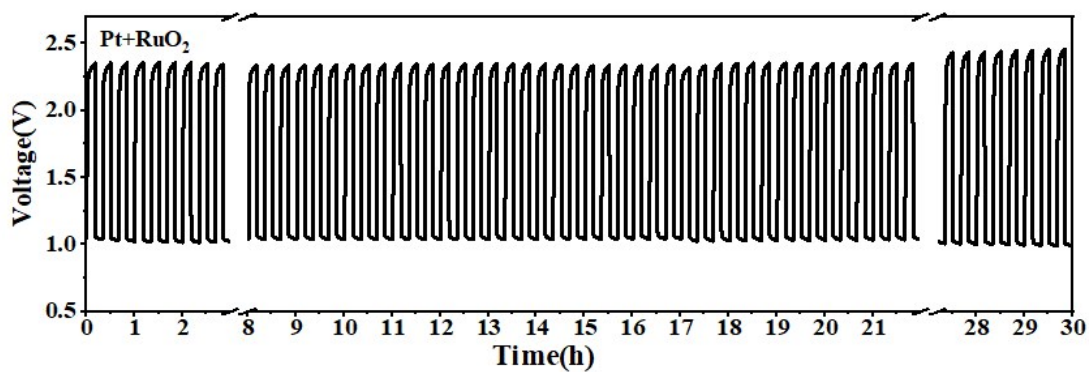

**Fig. S19.** Cycling performance at the charging and discharging current density of 10 mA cm<sup>-2</sup> of the ZnAB battery with Pt/C+RuO<sub>2</sub> as the air cathode catalyst.

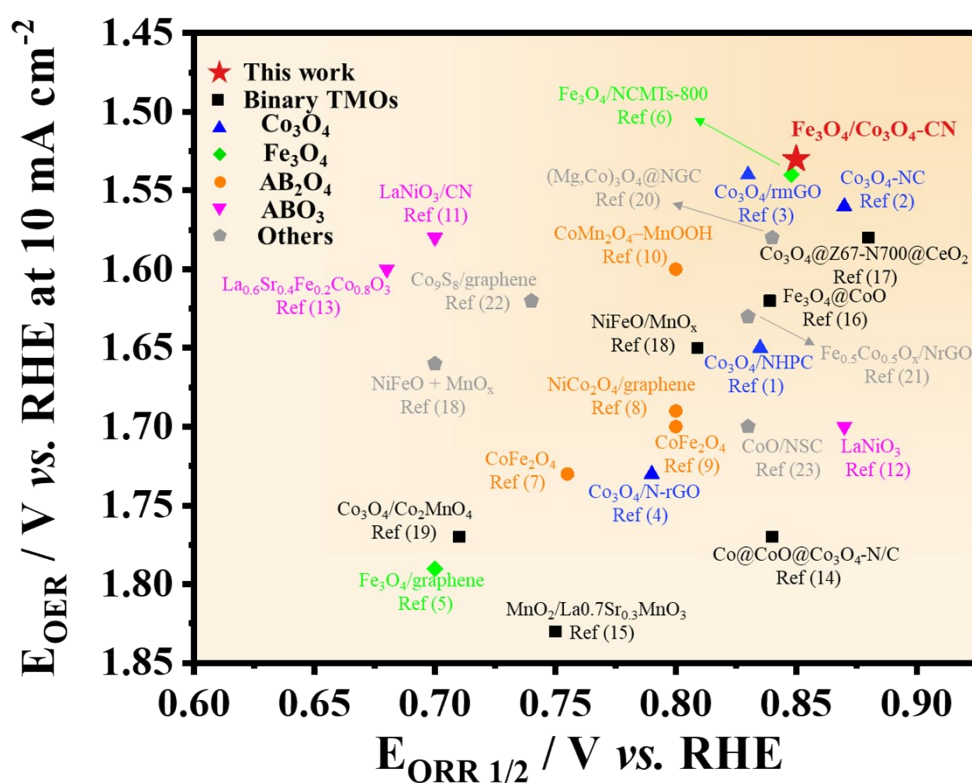

Fig. S20. Comparison of  $\Delta E$  of  $\text{Fe}_3\text{O}_4/\text{Co}_3\text{O}_4\text{-CN}$  with other reported bifunctional metal oxide-based catalysts in literatures.

Table S1. The BET surface area and pore size distribution of catalysts.

| Catalysts                                               | BET ( $\text{m}^2 \text{g}^{-1}$ ) |                                                  |                 |                                     |
|---------------------------------------------------------|------------------------------------|--------------------------------------------------|-----------------|-------------------------------------|
|                                                         | Micro-pores<br>( $<2\text{nm}$ )   | Meso-/macro-pores<br>( $2\text{-}100\text{nm}$ ) | surface<br>area | (meso-/macro-<br>pores)/micro-pores |
|                                                         | Area                               | Area                                             |                 |                                     |
| $\text{Fe}_3\text{O}_4/\text{Co}_3\text{O}_4\text{-CN}$ | 462                                | 546                                              | 1008            | 1.18                                |
| $\text{Co}_3\text{O}_4\text{-CN}$                       | 502                                | 257                                              | 795             | 0.51                                |
| $\text{Fe}_2\text{O}_3\text{-CN}$                       | 762                                | 558                                              | 1320            | 0.73                                |
| CN                                                      | 744                                | 436                                              | 1180            | 0.59                                |

**Table S2.** The detailed binding energies and integrated areas of Co 2p, Fe 2p, N 1s and O 1s peaks of the samples.

|           |                    | Fe <sub>3</sub> O <sub>4</sub> /Co <sub>3</sub> O <sub>4</sub> -CN |         | Co <sub>3</sub> O <sub>4</sub> -CN |         | Fe <sub>2</sub> O <sub>3</sub> -CN |         |
|-----------|--------------------|--------------------------------------------------------------------|---------|------------------------------------|---------|------------------------------------|---------|
|           |                    | position                                                           | area    | position                           | area    | position                           | area    |
| <b>Co</b> | Co <sup>2+</sup>   | 782.36                                                             | 468.78  | 781.51                             | 782.12  | -                                  | -       |
|           | Co <sup>2+</sup> ' | 797.21                                                             | 242.93  | 796.63                             | 378.21  | -                                  | -       |
|           | Co <sup>3+</sup>   | 779.88                                                             | 1231.91 | 779.77                             | 636.69  | -                                  | -       |
|           | Co <sup>3+</sup> ' | 794.88                                                             | 638.41  | 794.93                             | 405.31  | -                                  | -       |
| <b>Fe</b> | Fe <sup>2+</sup>   | 709.74                                                             | 447.09  | -                                  | -       | 709.57                             | 106.74  |
|           | Fe <sup>2+</sup> ' | 722.50                                                             | 298.83  | -                                  | -       | 722.34                             | 58.35   |
|           | Fe <sup>3+</sup>   | 711.33                                                             | 673.99  | -                                  | -       | 710.89                             | 357.71  |
|           | Fe <sup>3+</sup> ' | 725.31                                                             | 244.89  | -                                  | -       | 725.47                             | 157.31  |
| <b>O</b>  | O <sub>a</sub>     | 530.15                                                             | 2624.68 | 529.80                             | 4039.84 | 529.88                             | 3828.53 |
|           | O <sub>b</sub>     | 531.83                                                             | 2372.23 | 531.34                             | 1325.69 | 531.52                             | 1453.29 |
|           | O <sub>c</sub>     | 533.04                                                             | 1132.44 | 532.81                             | 734.33  | 532.90                             | 929.81  |
| <b>N</b>  | Pyri-N             | 398.42                                                             | 1517.21 | 398.12                             | 1545.14 | 398.16                             | 630.80  |
|           | Pyrr-N             | 399.92                                                             | 326.88  | 399.77                             | 1078.31 | 399.84                             | 646.11  |
|           | Grap-N             | 400.95                                                             | 1035.37 | 400.81                             | 832.96  | 401.05                             | 372.68  |
|           | Oxid-N             | 403.11                                                             | 218.98  | 403.47                             | 139.28  | 403.30                             | 90.47   |

The molar percentage of Fe<sup>2+</sup> and Co<sup>2+</sup> are calculated by using

$$[Fe^{2+}] = \frac{A_{Fe^{2+}} + A_{Fe^{2+'}}}{A_{Fe^{2+}} + A_{Fe^{2+'}} + A_{Fe^{3+}} + A_{Fe^{3+'}}}$$

$$[Co^{2+}] = \frac{A_{Co^{2+}} + A_{Co^{2+'}}}{A_{Co^{2+}} + A_{Co^{2+'}} + A_{Co^{3+}} + A_{Co^{3+'}}}$$

where A is the integrated area of metal ion (Fe<sup>2+</sup>, Fe<sup>3+</sup>, Co<sup>2+</sup> and Co<sup>3+</sup>) peak shown in Table S2.

**Table S3.** Potential differences comparison of Fe<sub>3</sub>O<sub>4</sub>/Co<sub>3</sub>O<sub>4</sub>-CN with previously reported bifunctional catalysts.

|                                | Catalyst material                                                                      | Mass loading / mg cm <sup>-2</sup> | E <sub>ORR</sub> <sub>1/2</sub> / V <sub>vs.</sub> RHE | E <sub>OER,j=10</sub> / V <sub>vs.</sub> RHE | ΔE (E <sub>OER,j=10</sub> - E <sub>ORR,1/2</sub> ) | Ref.      |
|--------------------------------|----------------------------------------------------------------------------------------|------------------------------------|--------------------------------------------------------|----------------------------------------------|----------------------------------------------------|-----------|
| Our Sample                     | Fe <sub>3</sub> O <sub>4</sub> /Co <sub>3</sub> O <sub>4</sub> -CN                     | 0.2                                | 0.85                                                   | 1.53                                         | 0.68                                               | This work |
| Co <sub>3</sub> O <sub>4</sub> | Co <sub>3</sub> O <sub>4</sub> /NHPC                                                   | 0.2                                | 0.835                                                  | 1.65                                         | 0.81                                               | 1         |
|                                | Co <sub>3</sub> O <sub>4</sub> -NC                                                     | 1.2                                | 0.87                                                   | 1.56                                         | 0.68                                               | 2         |
|                                | Co <sub>3</sub> O <sub>4</sub> /rmGO                                                   | -                                  | 0.83                                                   | 1.54                                         | 0.69                                               | 3         |
|                                | Co <sub>3</sub> O <sub>4</sub> /N-rGO                                                  | 0.12                               | 0.79                                                   | 1.73                                         | 0.93                                               | 4         |
| Fe <sub>3</sub> O <sub>4</sub> | Fe <sub>3</sub> O <sub>4</sub> /graphene                                               | 0.2                                | 0.7                                                    | 1.79                                         | 1.09                                               | 5         |
|                                | Fe <sub>3</sub> O <sub>4</sub> /NCMTs-800                                              | 0.1                                | 0.848                                                  | 1.54                                         | 0.7                                                | 6         |
| AB <sub>2</sub> O <sub>4</sub> | CoFe <sub>2</sub> O <sub>4</sub>                                                       | -                                  | 0.755                                                  | 1.73                                         | 0.87                                               | 7         |
|                                | NiCo <sub>2</sub> O <sub>4</sub> /graphene                                             | 0.4                                | 0.8                                                    | 1.69                                         | 0.99                                               | 8         |
|                                | CoFe <sub>2</sub> O <sub>4</sub>                                                       | 0.1                                | 0.8                                                    | 1.7                                          | 0.9                                                | 9         |
|                                | CoMn <sub>2</sub> O <sub>4</sub> -MnOOH                                                | -                                  | 0.8                                                    | 1.6                                          | 0.8                                                | 10        |
| ABO <sub>3</sub>               | LaNiO <sub>3</sub> /CN                                                                 | 0.1                                | 0.7                                                    | 1.58                                         | 0.88                                               | 11        |
|                                | LaNiO <sub>3</sub>                                                                     | 0.78                               | 0.87                                                   | 1.7                                          | 0.85                                               | 12        |
|                                | La <sub>0.6</sub> Sr <sub>0.4</sub> Fe <sub>0.2</sub> Co <sub>0.8</sub> O <sub>3</sub> | 0.2                                | 0.68                                                   | 1.6                                          | 0.95                                               | 13        |
| Binary TMOs                    | Co@CoO@Co <sub>3</sub> O <sub>4</sub> -N/C                                             | 0.25                               | 0.84                                                   | 1.77                                         | 0.92                                               | 14        |
|                                | MnO <sub>2</sub> /La <sub>0.7</sub> Sr <sub>0.3</sub> MnO <sub>3</sub>                 | 0.23                               | 0.75                                                   | 1.83                                         | 1.04                                               | 15        |
|                                | Fe <sub>3</sub> O <sub>4</sub> @CoO                                                    | 0.3                                | 0.839                                                  | 1.62                                         | 0.77                                               | 16        |
|                                | Co <sub>3</sub> O <sub>4</sub> @Z67-N700@CeO <sub>2</sub>                              | 0.126                              | 0.88                                                   | 1.58                                         | 0.68                                               | 17        |
|                                | NiFeO/MnO <sub>x</sub>                                                                 | 0.1                                | 0.8                                                    | 1.63                                         | 0.83                                               | 18        |
|                                | Co <sub>3</sub> O <sub>4</sub> /Co <sub>2</sub> MnO <sub>4</sub>                       | 0.2                                | 0.71                                                   | 1.77                                         | 1.03                                               | 19        |
| Others                         | (Mg,Co) <sub>3</sub> O <sub>4</sub> @NGC                                               | 0.3                                | 0.842                                                  | 1.58                                         | 0.73                                               | 20        |
|                                | NiFeO + MnO <sub>x</sub>                                                               | 0.1                                | 0.809                                                  | 1.613                                        | 0.793                                              | 18        |
|                                | Fe <sub>0.5</sub> Co <sub>0.5</sub> O <sub>x</sub> /NrGO                               | 0.5                                | 0.83                                                   | 1.63                                         | 0.78                                               | 21        |
|                                | Co <sub>9</sub> S <sub>8</sub> /graphene                                               | 0.2                                | 0.74                                                   | 1.62                                         | 0.86                                               | 22        |
|                                | CoO-NSC                                                                                | -                                  | 0.83                                                   | 1.70                                         | 0.88                                               | 23        |

## References

- 1 J. Guan, Z. Zhang, J. Ji, M. Dou, F. Wang, *ACS Appl. Mater. Inter.*, 2017, **9**, 30662-30669.
- 2 C. Guan, A. Sumboja, H. Wu, W. Ren, X. Liu, H. Zhang, Z. Liu, C. Cheng, S.J. Pennycook, J. Wang, *Adv. Mater.*, 2017, **29**, 1704117.
- 3 Y. Liang, Y. Li, H. Wang, J. Zhou, J. Wang, T. Regier, H. Dai, *Nat. Mater.*, 10 2011 780-786.
- 4 F. Cheng, T. Zhang, Y. Zhang, J. Du, X. Han, J. Chen, Enhancing electrocatalytic oxygen reduction on MnO<sub>2</sub> with vacancies, *Angew. Chem. Int. Ed.*, 2013, **52**, 2474-2477.
- 5 B. Zhao, Y. Zheng, F. Ye, X. Deng, X. Xu, M. Liu, Z. Shao, *ACS Appl. Mater. Inter.*, 2015, **7**, 14446-14455.
- 6 G. Liu, B. Wang, P. Ding, Y. Ye, W. Wei, W. Zhu, L. Xu, J. Xia, H. Li, *J. Alloy. Compd.*, 2019, **797**, 849-858.
- 7 W. Bian, Z. Yang, P. Strasser, R. Yang, *J. Power Sources*, 2014, **250**, 196-203.
- 8 D.U. Lee, B.J. Kim, Z. Chen, *J. Mater. Chem. A*, 2013, **1**, 4754-4762.
- 9 A. Indra, P.W. Menezes, N.R. Sahraie, A. Bergmann, C. Das, M. Tallarida, D. Schmeißer, P. Strasser, M. Driess, *J. Am. Chem. Soc.*, 2014, **136**, 17530-17536.
- 10 Y. Wang, T. Hu, Q. Liu, L. Zhang, *Chem. Commun.*, 2018, **54**, 4005-4008.
- 11 W.G. Hardin, D.A. Slanac, X. Wang, S. Dai, K.P. Johnston, K.J. Stevenson, *J. Phys. Chem. Lett.*, 2013, **4**, 1254-1259.
- 12 D.U. Lee, H.W. Park, M.G. Park, V. Ismayilov, Z. Chen, *ACS Appl. Mater. Inter.*, 2015, **7**, 902-910.
- 13 K. Elumeeva, J. Masa, J. Sierau, F. Tietz, M. Muhler, W. Schuhmann, *Electrochim. Acta*, 2016, **208**, 25-32.
- 14 G. Xu, G.C. Xu, J.J. Ban, L. Zhang, H. Lin, C.L. Qi, Z.P. Sun, D.Z. Jia, *J. Colloid Interf. Sci.*, 2018, **521**, 141-149.
- 15 S. Yan, Y. Xue, S. Li, G. Shao, Z. Liu, *ACS Appl. Mater. Inter.*, 2019, **11**, 25870-25881.



- 16 L. Zhou, B. Deng, Z. Jiang, Z.J. Jiang, Chem. Commun., 2019, **55**, 525-528.
- 17 X. Li, S. You, J. Du, Y. Dai, H. Chen, Z. Cai, N. Ren, J. Zou, J. Mater. Chem. A, 2019, **7**, 25853-25864.
- 18 J. Guan, Z. Zhang, J. Ji, M. Dou, F. Wang, ACS Appl. Mater. Inter., 2017, **9**, 30662-30669.
- 19 D. Wang, X. Chen, D.G. Evans, W. Yang, Nanoscale, 2013, **5**, 5312-5315.
- 20 Y.P. Deng, Y. Jiang, D. Luo, J. Fu, R. Liang, S. Cheng, Z. Bai, Y. Liu, W. Lei, L. Yang, ACS Energy Lett., 2017, **2**, 2706-2712.
- 21 L. Wei, H.E. Karahan, S. Zhai, H. Liu, X. Chen, Z. Zhou, Y. Lei, Z. Liu, Y. Chen, Adv. Mater., 2017, **29**, 1701410.
- 22 S. Dou, L. Tao, J. Huo, S. Wang, L. Dai, Energ. Environ. Sci., 2016, **9**, 1320-1326.
- 23 S. Chen, S. Chen, B. Zhang, J. Zhang, ACS Appl. Mater. Inter., 2019, **11**, 16720-16728.
